# Supplementary material for: Novel, First-in-Human, Oral PCLX-001 Treatment in a Patient with Relapsed Diffuse Large B-Cell Lymphoma
Source: MDPI journal article supplement (doi:10.3390/curroncol29030158), 2022-03-13
Supplement: s1 [file s1]

# Novel, First-In-Human, Oral PCLX-001 Treatment in a Patient with Relapsed Diffuse Large B-Cell Lymphoma

Randeep Sangha, Neal M. Davies, Afshin Namdar, Michael Chu, Jennifer Spratlin, Erwan Beauchamp, Luc G. Berthiaume and John R. Mackey

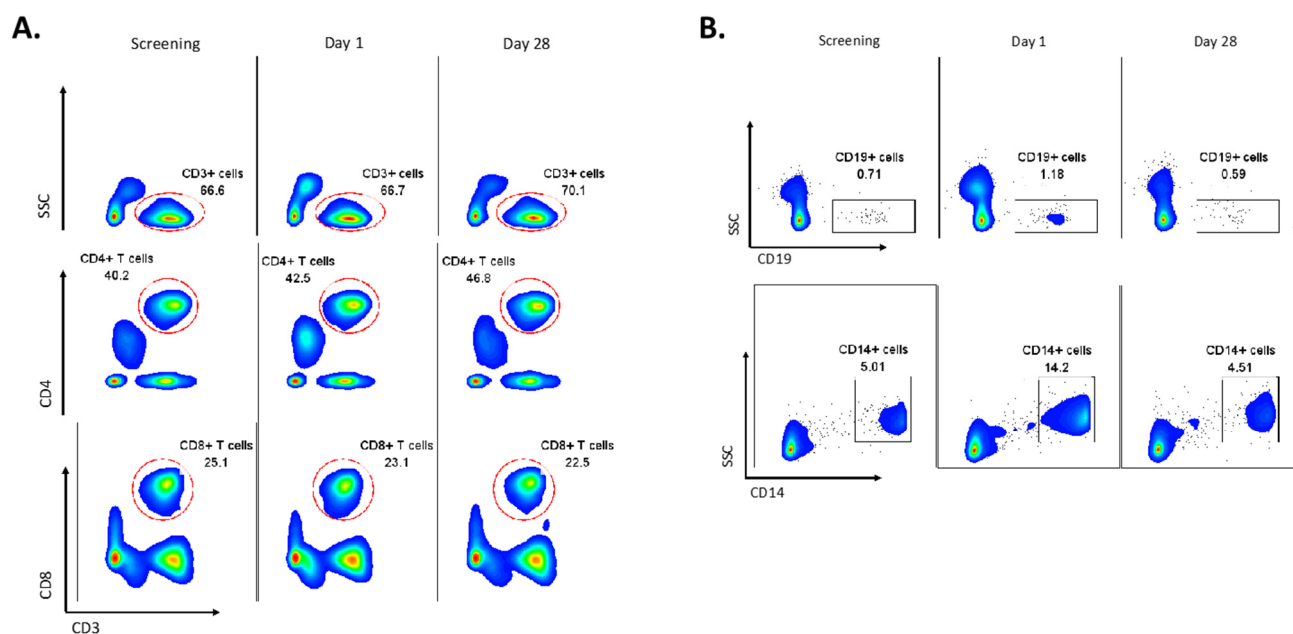

**Figure S1.** Impact of PCLX-001 treatment on T cell, B cell and monocyte populations. PBMC were isolated from patient 1 during screening, Day 1 and after 28 days of treatment with PCLX-001 and analysed by flow cytometry. Extracellular staining allowed us to analyse proportion of live total T cells (CD3+), CD4+ T cells, CD8+ T cells (A), B cells (CD19+) and monocytes (CD14+) (B).

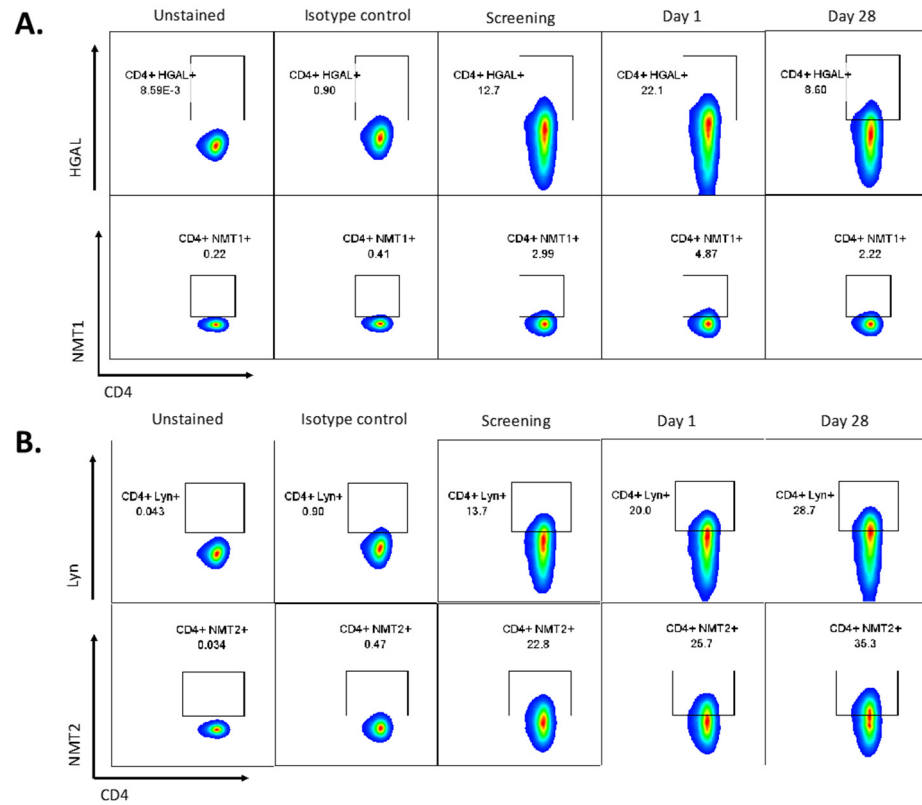

**Figure S2.** Impact of PCLX-001 treatment on intracellular levels of NMT1, NMT2, HGAL and Lyn in the CD4+ T cells. PBMC were isolated from patient 1 during screening, Day 1 and after 28 days of treatment with PCLX-001 and analysed by flow cytometry. Intracellular staining allowed us to analysed HGAL, NMT1 (A), Lyn and NMT2 levels in CD4+ T cell population (B).

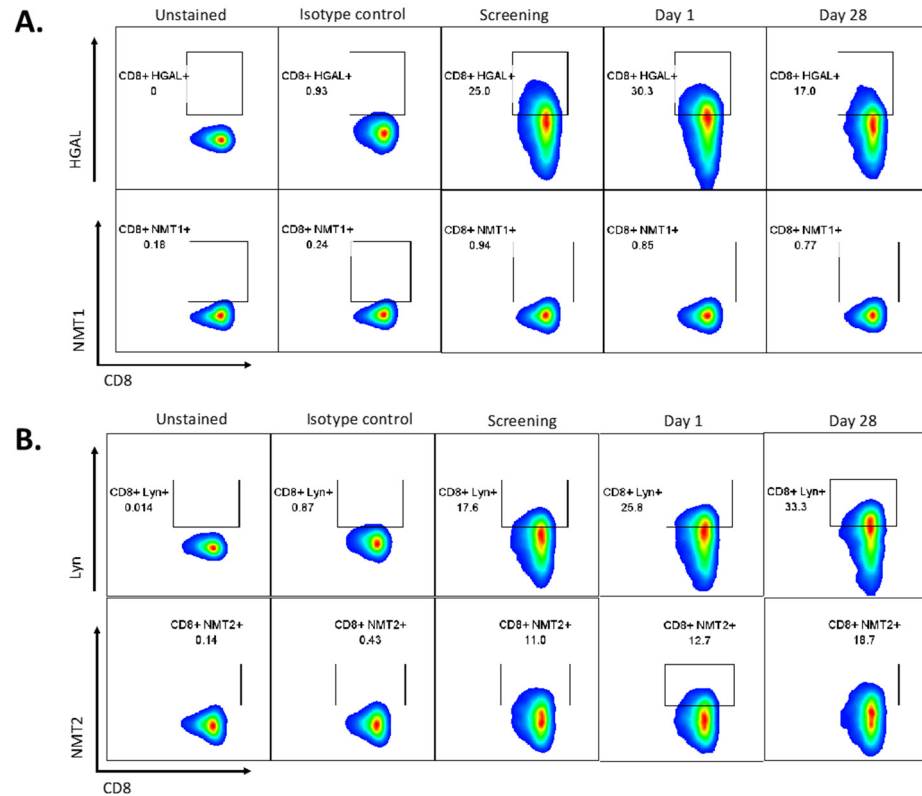

**Figure S3.** Impact of PCLX-001 treatment on intracellular levels of NMT1, NMT2, HGAL and Lyn in CD8+ T cells. PBMC were isolated from patient 1 during screening, Day 1 and after 28 days of treatment with PCLX-001 and analysed by flow cytometry. Intracellular staining allowed us to analysed HGAL, NMT1 (A), Lyn and NMT2 levels in CD8+ T cell population (B).

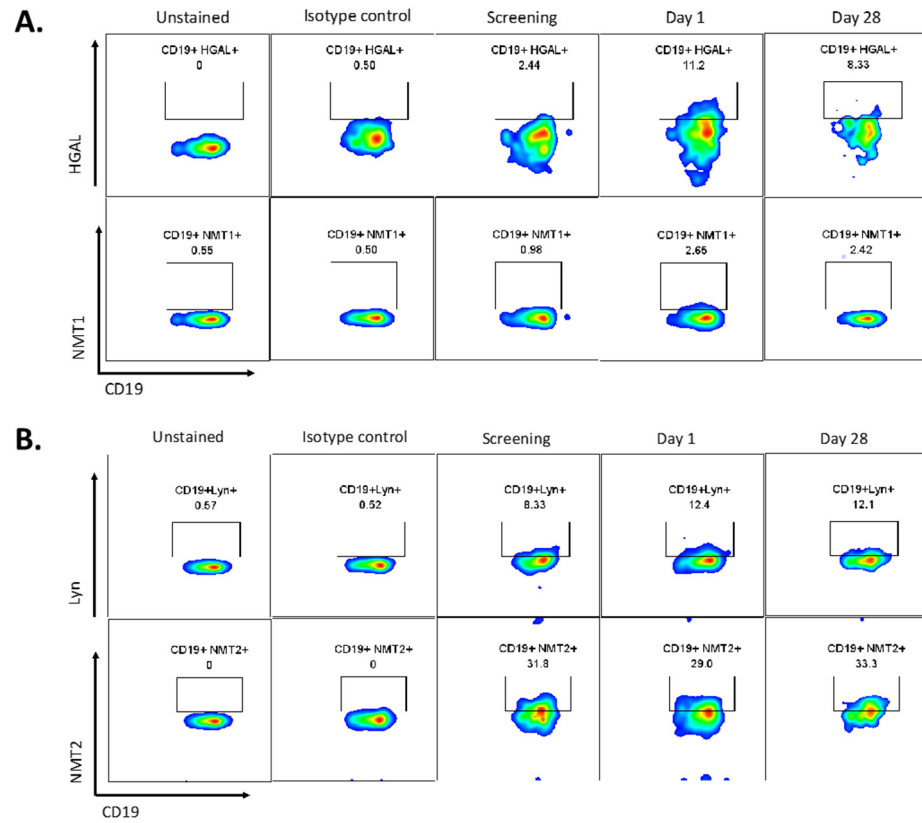

**Figure S4.** Impact of PCLX-001 treatment on intracellular levels of NMT1, NMT2, HGAL and Lyn in CD19+ B cells. PBMC were isolated from patient 1 during screening, Day 1 and after 28 days of treatment with PCLX-001 and analysed by flow cytometry. Intracellular staining allowed us to analysed HGAL, NMT1 (A), Lyn and NMT2 levels in CD19+ B cell population (B).

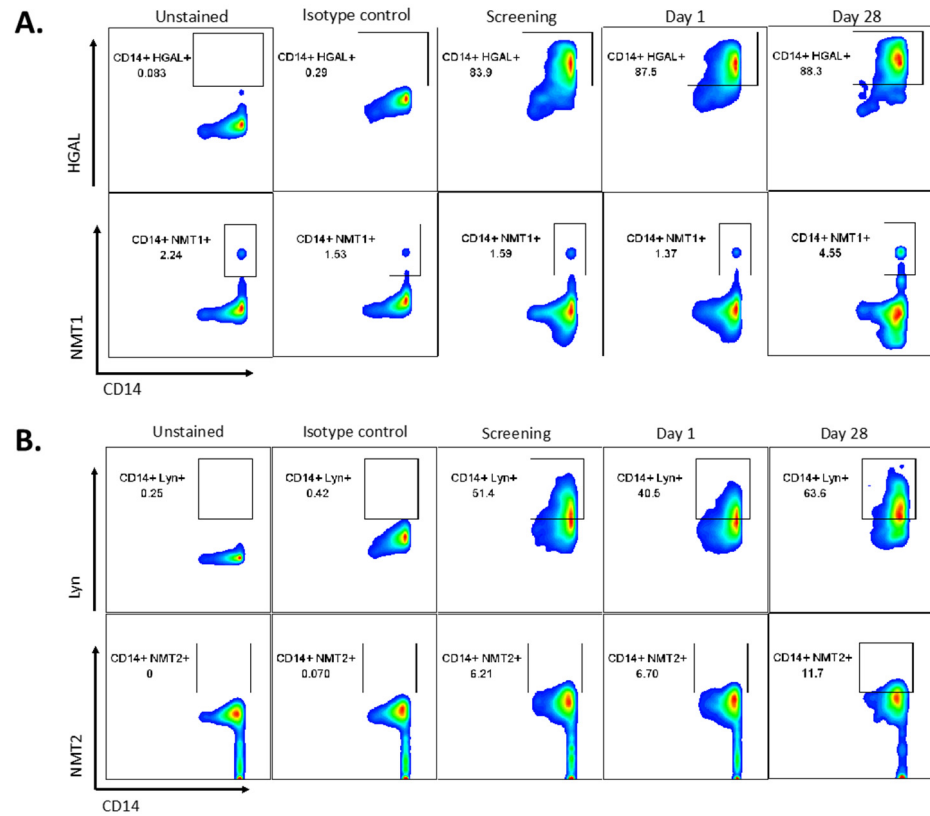

**Figure S5.** Impact of PCLX-001 treatment on intracellular levels of NMT1, NMT2, HGAL and Lyn in CD14+ monocytes. PBMC were isolated from patient 1 during screening, Day 1 and after 28 days of treatment with PCLX-001 and analysed by flow cytometry. Intracellular staining allowed us to analyse HGAL, NMT1 (A), Lyn and NMT2 levels in CD14+ monocyte population (B).
